# Supplementary material for: Modulation of SNARE-dependent exocytosis in astrocytes improves neuropathology in Huntington's disease
Source: PubMed Central journal article supplement (PMC11583919; doi:10.1242/dmm.052002), 2024-11-11
Supplement: dmm-17-052002-s1.pdf [file dmm-17-052002-s1.pdf]

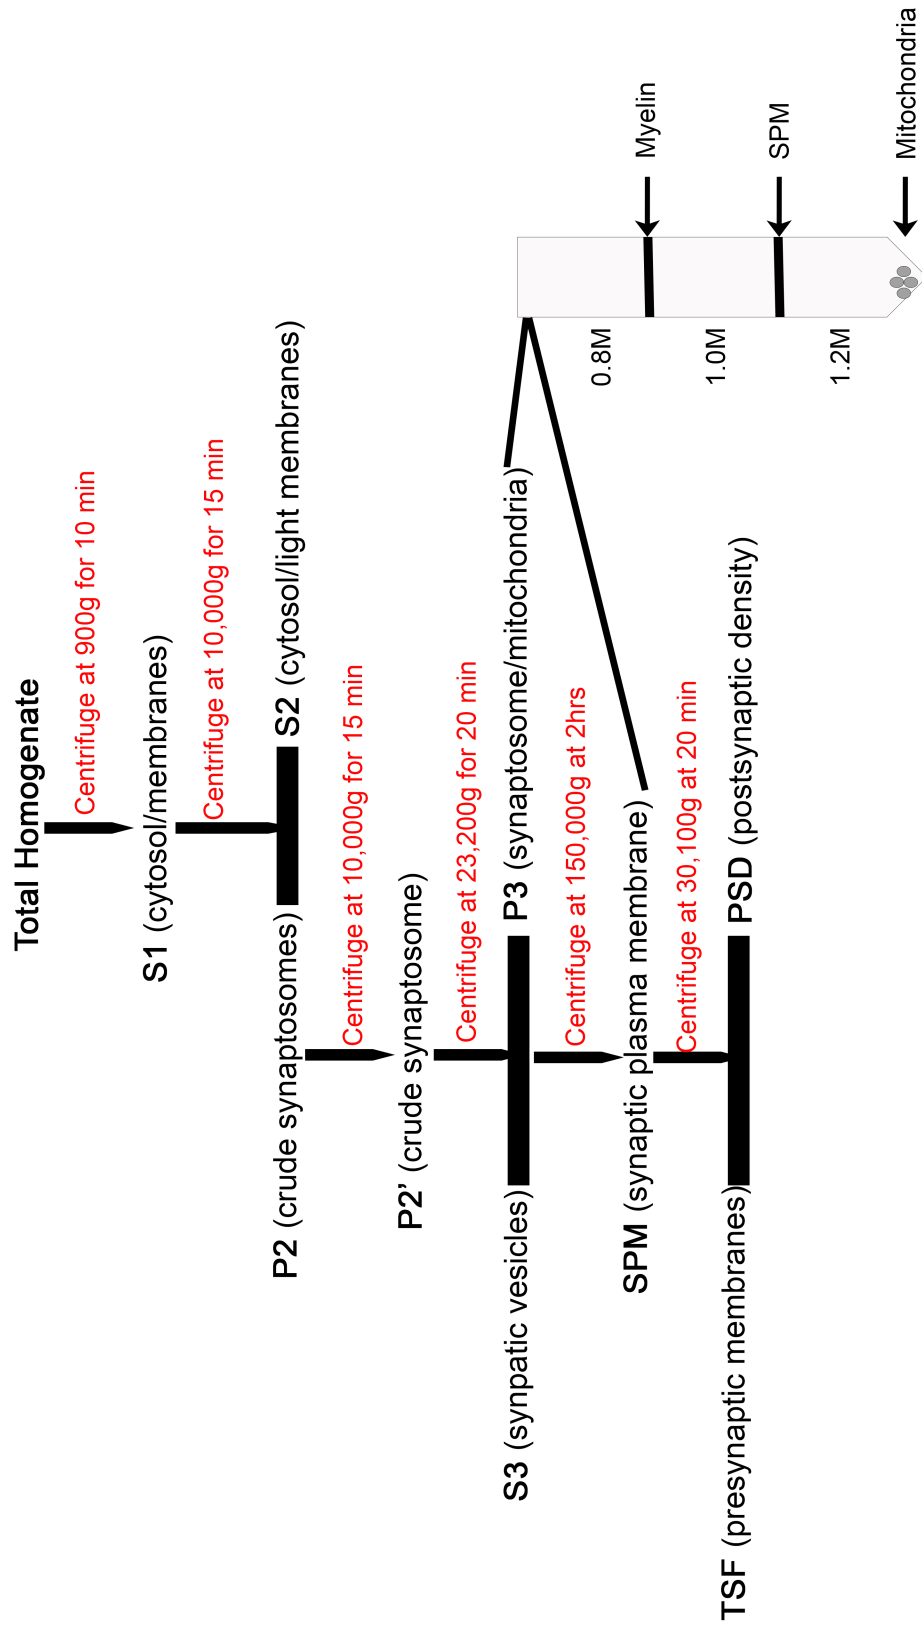

**Fig. S1.** Subcellular Fractionation Schematic. Subcellular fractionation is the separation of specific cellular compartments through numerous centrifugations. The fractions are bolded while the centrifugation parameters to obtain each lysate are displayed in red. A diagram is provided to show how P3 centrifugation separates into three fractions: myelin, synaptic plasma membrane (SPM), and mitochondria. SPM is collected to obtain the remaining fractions in this process.
